# Supplementary material for: Leadership Effectiveness in Healthcare Settings: A Systematic Review and Meta-Analysis of Cross-Sectional and Before–After Studies
Source: MDPI journal article supplement (doi:10.3390/ijerph191710995), 2022-09-02
Supplement: s1 [file s1]

## Supplementary material

All before after studies were conducted in the hospital settings, of which 8 (66·7%) were from public service and 6 (50·0%) were in surgical wards. Trauma care was the most studied specialty (n=3, 25·0%). Multi professional teams (n=8, 66·7%) were involved more frequently than the one professional healthcare workers (n=4, 33·3%). Savage *et al* reported both of outcomes: performance was identified in checklist adherence, surgical quality control procedures and post-operative length of stay; guidelines adherence was in pre-operative treatment adherence and further diagnostic procedure.

| First author and type of outcome              | Publication year | Continent     | Public or private organization | Hospital or Local health Unit | Surgical or medical ward | Multi or single professional | Specialty type                                                                 | Sample size | Quality score | Year of study conduction |
|-----------------------------------------------|------------------|---------------|--------------------------------|-------------------------------|--------------------------|------------------------------|--------------------------------------------------------------------------------|-------------|---------------|--------------------------|
| Outcome: guidelines adherence                 |                  |               |                                |                               |                          |                              |                                                                                |             |               |                          |
| Anderson DJ.[38]                              | 2019             | North America | private                        | Hospital                      | medical and surgical     | Multi                        | Pharmacist and Physicians                                                      | 13539       | 12            | >2011                    |
| Broom J.[34]                                  | 2018             | Oceania       | public                         | Hospital                      | surgical                 | Multi                        | Surgeon, Nurses, Infectious Diseases/AMS Service, Junior Doctor and Pharmacist | 22          | 10            | >2011                    |
| Guanche Garcell H.[35]                        | 2019             | Asia          | private                        | Hospital                      | surgical                 | Single                       | Surgeon                                                                        | 292         | 12            | >2011                    |
| Guzman-Parra J.[36]                           | 2016             | Europe        | public                         | Hospital                      | medical                  | Multi                        | Psichiatric                                                                    | 735         | 11            | >2011                    |
| Kane M.[32]                                   | 2016             | North America | public                         | Hospital                      | medical and surgical     | Multi                        | Multiprofessional                                                              | 68          | 10            | >2011                    |
| Lewiss RE.[33]                                | 2016             | North America | public                         | Hospital                      | surgical                 | Multi                        | Emergency healthcare workers                                                   | 1131        | 7             | <2011                    |
| Outcome: performance                          |                  |               |                                |                               |                          |                              |                                                                                |             |               |                          |
| Clements A.[29]                               | 2015             | Oceania       | public                         | Hospital                      | surgical                 | Single                       | Emergency nursing staff                                                        | 40          | 4             | >2011                    |
| Davies C.[40]                                 | 2019             | Europe        | private                        | Hospital                      | medical and surgical     | Single                       | Nurse                                                                          | 1254        | 8             | >2011                    |
| Murphy M.[37]                                 | 2018             | Oceania       | public                         | Hospital                      | surgical                 | Multi                        | Trauma team (Doctors, Nurses, Allied Health)                                   | 1273        | 11            | <2011                    |
| Stargell LF[41]                               | 2018             | North America | private                        | Hospital                      | medical                  | Multi                        | Senior Leader                                                                  | 3600        | 8             | >2011                    |
| Weech-Maldonado R.[39]                        | 2019             | North America | public                         | Hospital                      | medical and surgical     | Multi                        | -                                                                              | 287         | 5             | <2011                    |
| Outcome: guidelines adherence and performance |                  |               |                                |                               |                          |                              |                                                                                |             |               |                          |
| Savage C.[31]                                 | 2017             | Europe        | public                         | Hospital                      | surgical                 | Single                       | Pediatric Surgeon                                                              |             | 11            | <2011                    |

0 **Table S1.** Before after studies included in this systematic review and meta-analysis.

The forest plot in Supplementary Figure 1 represented the interventions effectiveness of each four leadership styles on healthcare outcomes. Transformational leadership style showed the highest outcome improvement with an increase of 27% (95%CI 12-42%), followed by transformational leadership style (24%; 95%CI 17-30%) and servant leadership style (13%; 95%CI 8-17%).

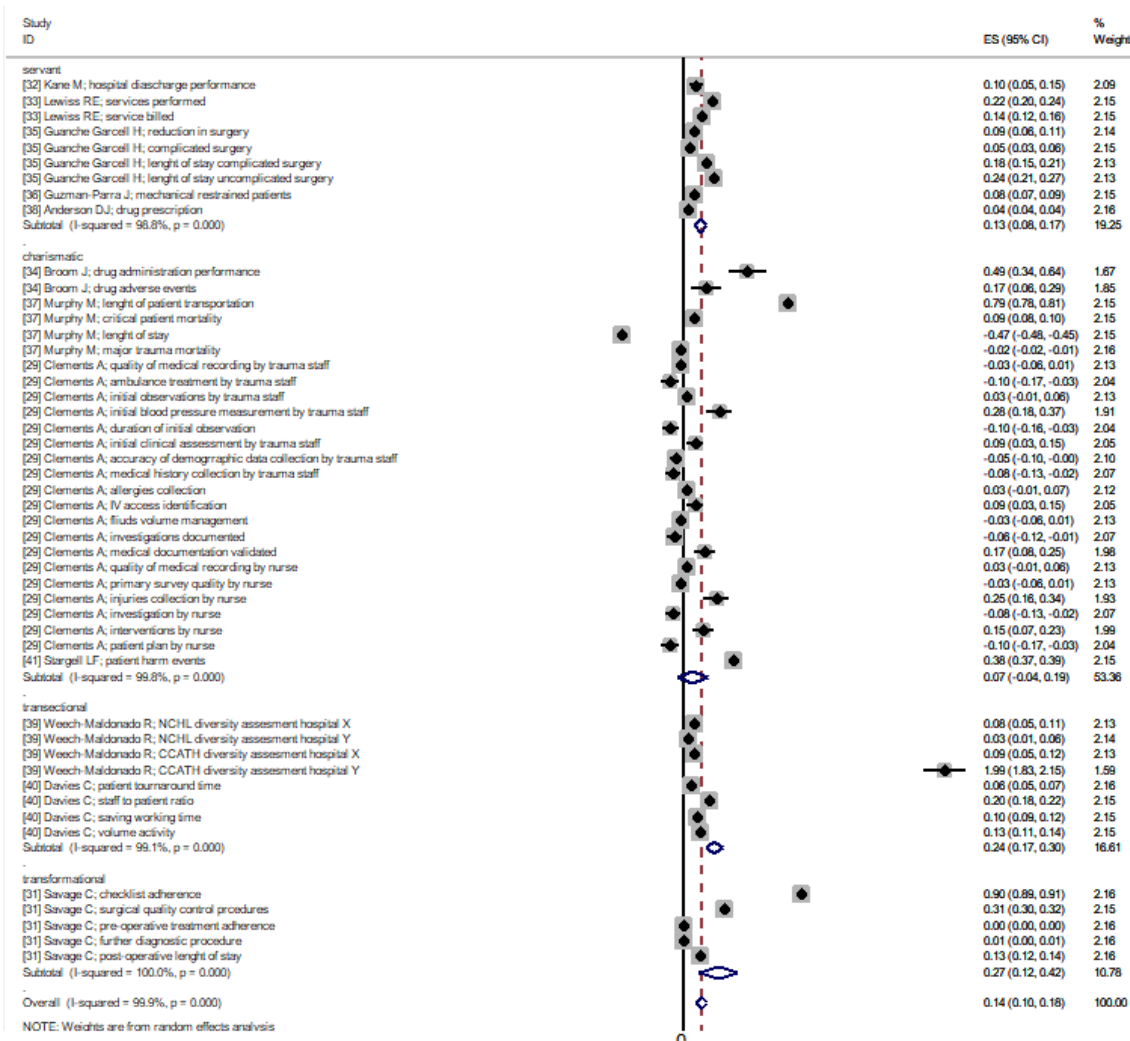

**Figure S1.** Leadership effectiveness by leadership style in before after studies.

Funnel plot for publication bias showed asymmetry among before after studies (Supplementary Figure 2).

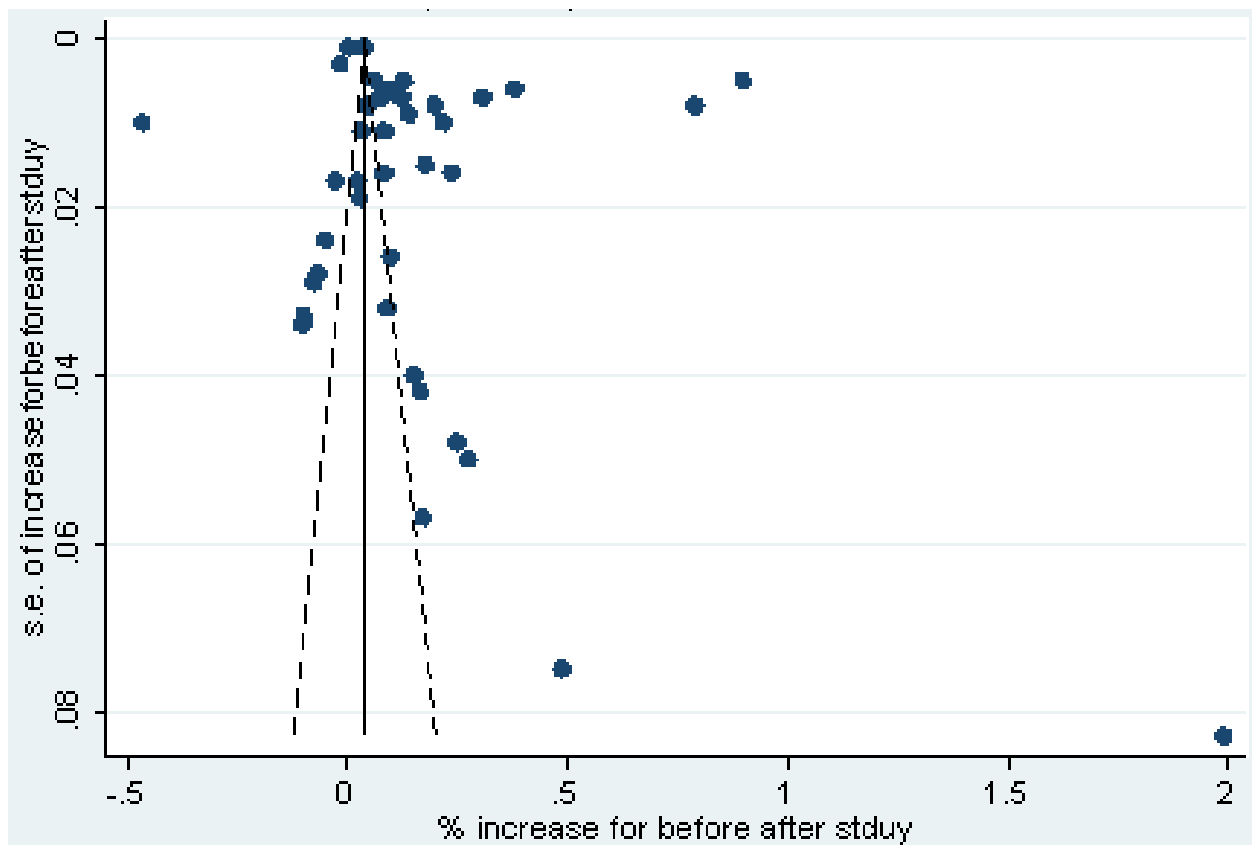

**Figure S2.** *Funnel plot of before after studies.*

Most of cross-sectional studies (Supplementary table 2) were conducted in hospital setting (n=7, 77·8%), while local health units (LHU) were analyzed in 2 articles (22·2%). Almost all studies were conducted within public healthcare organizations (n=8, 88·9%).

| First author      | Publication year | Continent     | Public or private organization | Hospital or local health unit | Surgical or medical ward | Multi or single professional | Specialty type                                                                      | Sample size | Quality score | Year of study conduction |
|-------------------|------------------|---------------|--------------------------------|-------------------------------|--------------------------|------------------------------|-------------------------------------------------------------------------------------|-------------|---------------|--------------------------|
| Asiri SA;[49]     | 2016             | Asia          | Public                         | hospital                      | medical and surgical     | single                       | Acute care unit                                                                     | 332         | 8             | >2011                    |
| Barling J;[47]    | 2018             | North America | Public                         | hospital                      | surgical                 | multi                        | Surgery, Urology, Obstetrics and Gynecology                                         | 150         | 9             | >2011                    |
| Gong Z;[43]       | 2019             | Asia          | Public                         | hospital                      | medical and surgical     | multi                        | Nursing care                                                                        | 458         | 10            | >2011                    |
| Hageman MGJS;[42] | 2015             | North America | Private                        | hospital                      | surgical                 | single                       | Orthopaedic surgeons                                                                | 26          | 4             | >2011                    |
| Kara A;[46]       | 2015             | North America | Public                         | hospital                      | medical and surgical     | multi                        | Nurses, Case managers, Pharmacists, Nutritionists, Medical students, Social workers | 110         | 7             | >2011                    |
| Kim H;[45]        | 2019             | Asia          | Public                         | hospital                      | medical and surgical     | multi                        | Nursing care                                                                        | 199         | 8             | >2011                    |
| Kim MH;[44]       | 2019             | Asia          | Public                         | hospital                      | medical and surgical     | multi                        | Nursing care                                                                        | 324         | 10            | >2011                    |
| Lornudd C;[30]    | 2015             | Europe        | Public                         | local health unit             | medical and surgical     | multi                        | Not specified healthcare workers                                                    | 1249        | 10            | <2011                    |
| Marin GH;[48]     | 2015             | SouthAmerica  | Public                         | local health unit             | medical                  | multi                        | Primary care                                                                        | 10          | 9             | <2011                    |

**Table S2.** Cross-sectional studies included in this systematic review and meta-analysis. All outcomes were performance.

Leadership style analysis reported in the forest plot (Supplementary Figure 3) showed that transectional leadership had the highest increase (0.48; 95%CI 0.14-0.82), followed by servant leadership style (0.20; 95%CI 0.14, 0.25). In detail, the study with the greatest increase was Marin GH *et al*, whose outcomes were good purchased with increase of 0.97 (95%CI 0.85-1.09) and invoiced with 0.95 (95% CI 0.79, 1.10). Member-leader turnover intention by charismatic leadership style was the worst outcome, decreasing leadership effectiveness with a correlation coefficient of 0.46 (95% CI 0.54- -0.38).

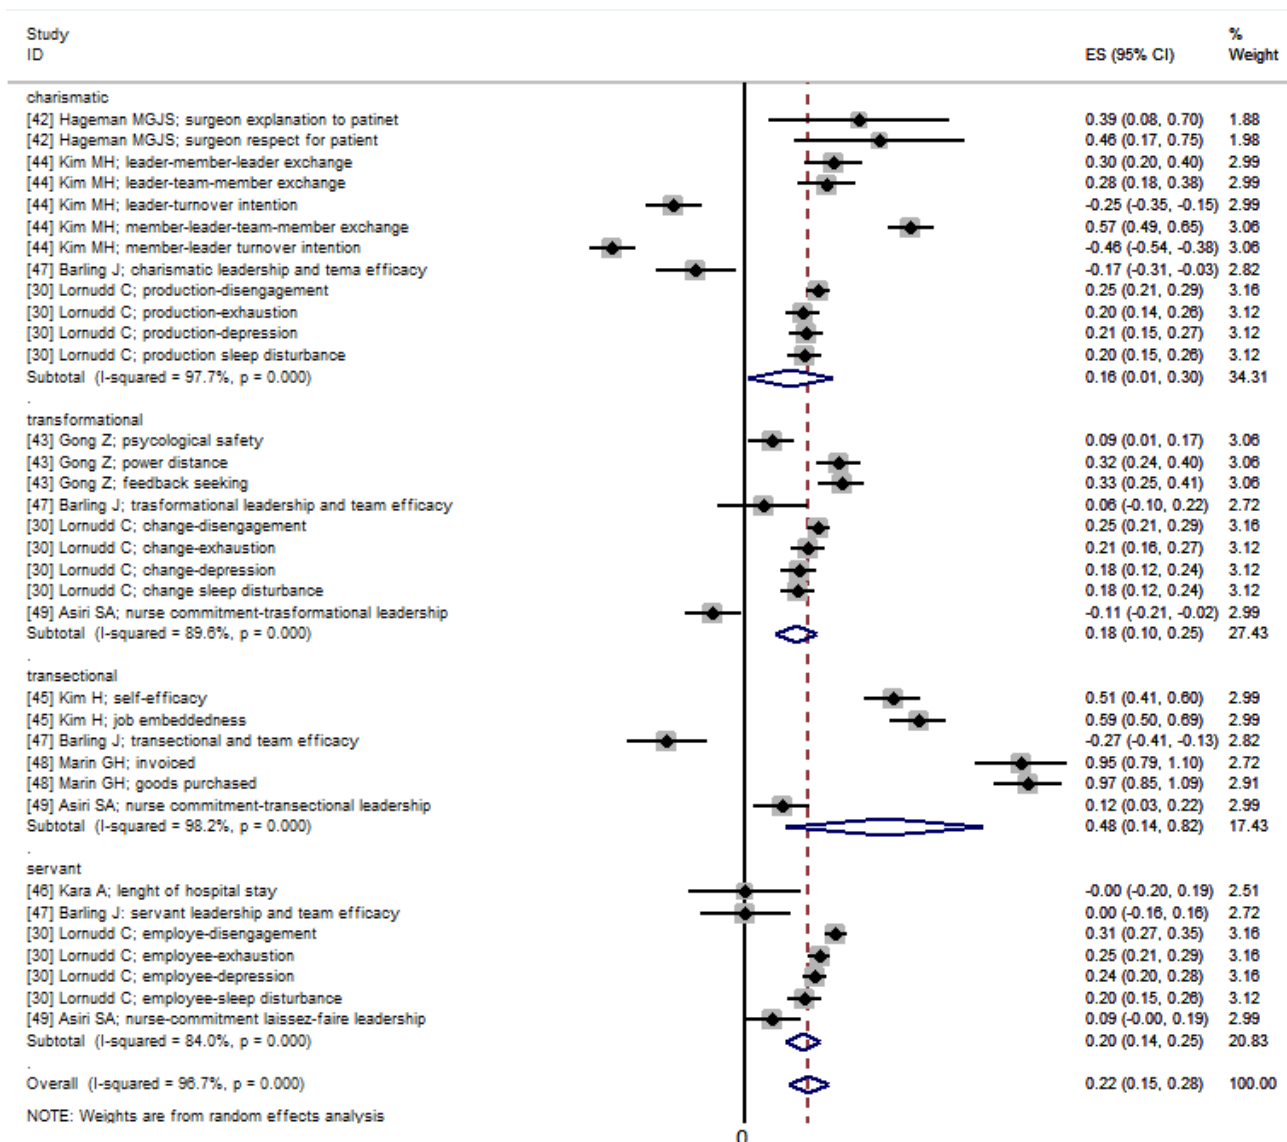

**Figure S3.** Leadership effectiveness in cross sectional studies by four leadership style.

Asymmetry and some outliers were checked in the funnel plot for cross-sectional studies (Supplementary Figure 5).

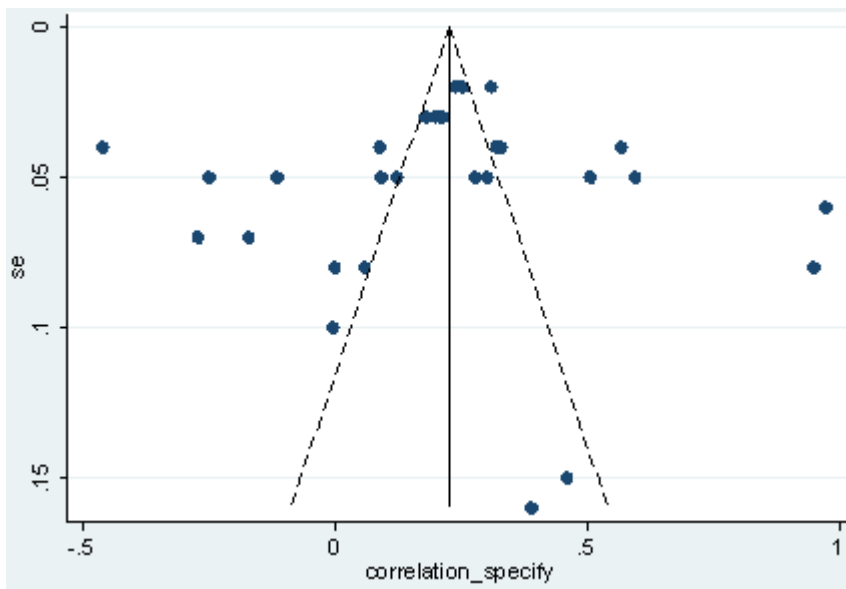

**Figure S4** *Funnel plot of cross-sectional studies.*
